# Supplementary material for: Industrial and Ruminant Trans-Fatty Acids-Enriched Diets Differentially Modulate the Microbiome and Fecal Metabolites in C57BL/6 Mice
Source: MDPI journal article supplement (doi:10.3390/nu15061433), 2023-03-16
Supplement: s1 [file s1]

**Table S1.** Fold-change for quantitative (Q) metabolites compared to day=0 in all groups.

|                          | Comparison within<br>EA group |      | Comparison within<br>TPA group |      | Comparison within<br>lecithin group |      | Comparison within<br>Water group |      |
|--------------------------|-------------------------------|------|--------------------------------|------|-------------------------------------|------|----------------------------------|------|
|                          | D7                            | D28  | D7                             | D28  | D7                                  | D28  | D7                               | D28  |
| <b>Carbohydrates</b>     |                               |      |                                |      |                                     |      |                                  |      |
| Glucose-6-phosphate      | -                             | 2.63 | 2.49                           | 5.05 | 0.28                                | 6.03 | 3.49                             | -    |
| Glucose                  | 75.57                         | -    | -                              | 2.73 | -                                   | 5.28 | -                                | -    |
| Fructose                 | -                             | 2.54 | 2.39                           | 2.34 | -                                   | 4.36 | -                                | -    |
| Lactose                  | -                             | 2.81 | -                              | -    | -                                   | -    | -                                | -    |
| Maltose                  | 0.38                          | -    | -                              | 3.65 | -                                   | 7.80 | -                                | -    |
| Mannitol                 | 0.03                          | 3.22 | -                              | -    | -                                   | 5.41 | 3.26                             | 2.20 |
| Mannose                  | 25.93                         | -    | 2.07                           | 2.50 | -                                   | 3.97 | 2.50                             | -    |
| Sucrose                  | 27.25                         | -    | -                              | -    | -                                   | -    | -                                | -    |
| Sorbitol                 | 0.11                          | -    | -                              | -    | -                                   | -    | -                                | -    |
| <b>Amino acids</b>       |                               |      |                                |      |                                     |      |                                  |      |
| Aspartic acid            | -                             | -    | -                              | -    |                                     | 2.07 | -                                | -    |
| Creatinine               | -                             | 3.63 |                                | 0.37 | 3.15                                | 4.67 | -                                | 3.93 |
| Cystathionine            | -                             | -    | -                              | -    | -                                   | 2.21 | -                                | -    |
| Glutamic acid            | -                             | -    | -                              | 2.53 | -                                   | 2.28 | 2.37                             | -    |
| Isoleucine               | -                             | -    | -                              | -    | -                                   | 2.64 | -                                | -    |
| Leucine                  | -                             | -    | -                              | -    | -                                   | 2.80 | -                                | -    |
| Phenylalanine            | -                             | -    | -                              | -    | -                                   | 2.27 | -                                | -    |
| 3-Aminoisobutyric acid   | -                             | -    | -                              | -    | -                                   | 2.37 | -                                | -    |
| <b>Vitamins</b>          |                               |      |                                |      |                                     |      |                                  |      |
| Ascorbic acid            | -                             | -    | -                              | -    | -                                   | 2.51 | 2.17                             | -    |
| Dehydroascorbic acid     | -                             | 0.50 | -                              | 0.30 |                                     | -    | -                                | -    |
| Ergocalciferol (Vit D2)  | -                             | -    | -                              | -    | 2.60                                | -    | -                                | -    |
| Nicotinic acid (Vit B3)  | -                             | 2.51 | 2.75                           | 3.11 | -                                   | 3.85 | 2.97                             | -    |
| <b>Other metabolites</b> |                               |      |                                |      |                                     |      |                                  |      |
| Citrulline               | -                             | -    | -                              | 2.42 | -                                   | 3.50 | -                                | -    |
| Citric acid              | -                             | -    | 0.50                           | -    | -                                   | -    | -                                | -    |
| Myo-inositol             | -                             | 2.01 | -                              | -    | 8.14                                | -    | -                                | 3.96 |
| Urea                     | -                             |      | 0.16                           | 0.15 | -                                   | 0.03 | -                                | -    |
| Uric acid                | -                             | -    | -                              | 0.36 | -                                   | 0.29 | -                                | -    |

Fold changes after Lecithin, EA, TPA, and water intake after 7 days and 28 days. Values below 1 show a decrease in metabolites and more than 1 show an increase in metabolites.

**Table S2.** Fold-change semi-quantitative metabolites compared to baseline (day 0) in all groups.

|                                                   | Comparison within<br>EA group |      | Comparison within<br>TPA group |      | Comparison within<br>lecithin group |      | Comparison within<br>Water group |      |
|---------------------------------------------------|-------------------------------|------|--------------------------------|------|-------------------------------------|------|----------------------------------|------|
|                                                   | D7                            | D28  | D7                             | D28  | D7                                  | D28  | D7                               | D28  |
| <b>Lipids (SCFA)</b>                              |                               |      |                                |      |                                     |      |                                  |      |
| Propionic acid                                    | -                             | -    | -                              | 2.38 | -                                   | -    | -                                | -    |
| Butyric acid                                      | -                             | -    | 2.27                           | 4.67 | -                                   | -    | -                                | -    |
| Isobutyric acid                                   | -                             | 0.4  | -                              | 2.16 | 0.46                                | -    | -                                | -    |
| Valeric acid                                      | -                             | 0.4  | -                              | -    | 0.50                                | -    | -                                | -    |
| Isovaleric acid                                   | 0.45                          | 0.34 | -                              | -    | 0.41                                | -    | -                                | -    |
| Isocaproic acid                                   | 0.29                          | 0.22 | -                              | -    | 0.33                                | 0.20 | 0.40                             | 0.18 |
| Caproic acid                                      | -                             | 0.38 | -                              | -    | -                                   | 0.45 | -                                | -    |
| Heptanoic acid                                    | 0.40                          | 0.3  | -                              | -    | 0.42                                | 0.23 | 0.47                             | 0.27 |
| <b>Other lipids</b>                               |                               |      |                                |      |                                     |      |                                  |      |
| Azelaic acid                                      | -                             | -    | -                              | -    | 2.09                                | -    | -                                | -    |
| Elaidic acid                                      | -                             | -    | -                              | -    | -                                   | -    | -                                | 2.02 |
| Methylsuccinic acid                               | -                             | -    | -                              | -    | -                                   | -    | -                                | 2.10 |
| Palmitoleic acid                                  | -                             | -    | -                              | 2.65 | 2.06                                | -    | 2.43                             | -    |
| Succinic semialdehyde                             | -                             | -    | -                              | -    | -                                   | -    | 2.41                             | -    |
| 9,12-Octadecadienoic acid<br>(Z,Z)-, methyl ester | -                             | 2.02 | -                              | -    | -                                   | -    | -                                | -    |
| Myristic acid                                     | -                             | -    | -                              | -    | -                                   | -    | -                                | 2.11 |
| <b>Carbohydrates</b>                              |                               |      |                                |      |                                     |      |                                  |      |
| D-glucose-6-phosphate                             | 0.12                          | 2.51 | 2.53                           | 5.01 | 0.29                                | 5.30 | 3.43                             | -    |
| Fructose                                          | 50.43                         | 2.58 | 2.39                           | 2.37 | -                                   | 4.32 | 2.57                             | 2.08 |
| Glucose                                           | 4.81                          | -    | -                              | 2.70 | -                                   | 5.17 | -                                | -    |
| Lactose                                           | 43.73                         | 2.84 | -                              | -    | -                                   | 2.97 | 0.39                             | 0.44 |
| Maltose                                           | 37.72                         | -    | -                              | 3.53 | -                                   | 7.43 | -                                | -    |
| Mannitol                                          | 0.42                          | 3.43 | -                              | -    | -                                   | 5.30 | 3.26                             | 2.21 |
| Mannose                                           | 18.71                         | 2.10 | 2.06                           | 2.36 | -                                   | 3.69 | 2.50                             | -    |
| Ribitol                                           | 0.05                          | -    | -                              | 0.45 | -                                   | -    | -                                | -    |
| Sucrose                                           | 24.55                         | -    | -                              | -    | -                                   | -    | -                                | -    |
| Sorbitol                                          | 2.49                          | -    | -                              | -    | -                                   | -    | -                                | -    |
| Xylitol                                           | 0.05                          | 2.29 | -                              | -    | 2.18                                | -    | -                                | 0.38 |
| <b>Amino acids</b>                                |                               |      |                                |      |                                     |      |                                  |      |
| Beta-Glutaric acid                                | -                             | -    | 2.96                           | -    | -                                   | -    | -                                | 2.99 |
| Creatinine                                        | -                             | 3.27 | -                              | 0.38 | 2.91                                | -    | -                                | 3.84 |
| Cystathionine                                     | -                             | -    | 2.04                           | -    | -                                   | -    | -                                | 3.70 |
| Glutamic acid                                     | -                             | -    | -                              | 2.54 | -                                   | -    | 2.48                             | -    |
| Leucine                                           | -                             | -    | -                              | -    | -                                   | 2.28 | -                                | -    |
| N-acetyl-D-glucosamine                            | 2.66                          | -    | -                              | -    | -                                   | -    | 2.02                             | -    |
| N-acetyl-L-aspartic acid                          | -                             | 2.07 | -                              | 2.04 | -                                   | -    | -                                | -    |
| N-acetyl-L-glutamic acid                          | -                             | -    | 2.29                           | -    | -                                   | -    | 3.31                             | 3.31 |
| Ornithine                                         | -                             | -    | 2.28                           | 2.64 | -                                   | -    | -                                | -    |
| Phosphoserine                                     | -                             | -    | -                              | -    | 2.27                                | -    | -                                | -    |
| Taurine                                           | 5.68                          | 4.15 | -                              | 2.17 | 2.72                                | -    | 3.18                             | -    |
| 3-Methylpiperazine-2,5-dione                      | -                             | -    | -                              | 2.17 | -                                   | -    | -                                | -    |

|                                    |   |      |      |      |      |       |      |      |
|------------------------------------|---|------|------|------|------|-------|------|------|
| <b>Vitamins</b>                    | - | -    | -    | -    | -    | -     | -    | -    |
| Ascorbic acid                      | - | -    | -    | -    | -    | 2.34  | 2.26 | -    |
| Alpha-Tocopherol acetate           | - | -    | -    | -    | -    | -     | -    | 2.18 |
| Dehydroascorbic acid               | - | -    | -    | 0.32 | -    | -     | -    | -    |
| Ergocalciferol (Vit D2)            | - | -    | -    | -    | 0.15 | -     | -    | -    |
| Nicotinic acid (Vit B3)            | - | 2.46 | 2.71 | 3.08 | -    | 3.69  | 2.95 | -    |
| Pantothenic acid (Vit B5)          | - | -    | -    | 0.28 | -    | -     | -    | -    |
| <b>Other metabolites</b>           | - | -    | -    | -    | -    | -     | -    | -    |
| Alpha ketoglutaric acid            | - | -    | 2.02 | -    | 0.48 | 3.58  | 4.12 | -    |
| Benzeacetic acid                   | - | -    | -    | 2.23 | 2.10 | -     | 2.98 | 2.01 |
| Bile acid 1                        | - | -    | -    | -    | -    | -     | 2.91 | -    |
| Bile acid 2                        | - | -    | -    | -    | 3.60 | 2.94  | 2.40 | -    |
| Bile acid 3                        | - | -    | -    | -    | 3.42 | -     | -    | -    |
| Bile acid 5                        | - | -    | 2.44 | -    | 9.04 | -     | -    | -    |
| Bile acid 8                        | - | -    | -    | -    | 2.71 | 2.27  | -    | -    |
| Bile acid 9                        | - | -    | -    | -    | -    | 2.37  | 2.64 | -    |
| Bile acid 10                       | - | -    | -    | -    | -    | 3.46  | 2.92 | -    |
| Citrulline                         | - | -    | -    | 2.26 | -    | -     | -    | -    |
| Flavin adenine dinucleotide        | - | -    | -    | -    | 2.18 | -     | -    | -    |
| Guanosine                          | - | 2.36 | 3.18 | 3.06 | -    | 7.75  | 4.43 | 2.36 |
| Glycerol 1-phosphate               | - | -    | 2.14 | -    | -    | 3.07  | 2.33 | -    |
| Hydro cinnamic acid                | - | -    | -    | 2.49 | -    | 3.16  | -    | -    |
| Hypotaurine                        | - | -    | 6.93 | 4.16 | -    | -     | -    | -    |
| Hypoxanthine                       | - | -    | 3.09 | 2.67 | -    | 4.44  | 3.47 | -    |
| Inosine                            | - | 2.28 | 4.24 | 5.23 | 0.41 | 10.57 | 5.05 | 2.18 |
| Myo-inositol                       | - | 2.00 | 0.39 | -    | 8.51 | 3.39  | -    | -    |
| Pseudo uridine                     | - | -    | -    | -    | 0.42 | 2.45  | 2.66 | -    |
| Spermidine                         | - | -    | 2.59 | -    | -    | 3.66  | 2.06 | -    |
| Uracil                             | - | -    | -    | -    | -    | 2.57  | 2.52 | -    |
| Urea                               | - | -    | 0.16 | 0.15 | -    | 0.03  | -    | -    |
| Uric acid                          | - | -    | -    | 0.37 | -    | 0.28  | -    | -    |
| Uridine                            | - | 3.96 | 5.30 | 5.93 | -    | 5.15  | 5.17 | 3.96 |
| Urocanic acid                      | - | -    | 2.60 | -    | -    | 3.42  | 2.00 | 2.00 |
| Xanthine                           | - | -    | -    | -    | -    | 2.60  | 3.14 | -    |
| 1-methyl nicotinamide              | - | -    | -    | -    | 0.37 | -     | -    | -    |
| 2-Hydroxyglutaric acid             | - | -    | -    | -    | 0.37 | -     | 3.79 | -    |
| 3-Indolepropionic acid             | - | -    | -    | 2.51 | -    | 3.24  | -    | -    |
| 3-(3-Hydroxyphenyl) propionic acid | - | -    | 0.38 | -    | -    | -     | 0.30 | -    |
| 3-aminoisobutyric acid             | - | -    | -    | -    | -    | 2.04  | -    | -    |
| 3,4-Dihydroxyphenylacetic acid     | - | 3.05 | -    | 2.40 | 0.47 | 2.91  | -    | 3.05 |
| 4-Hydroxybenzeneacetic acid        | - | 2.61 | -    | -    | 0.50 | -     | -    | 2.61 |
| 5-Hydroxy indole-3-acetic acid     | - | -    | 0.38 | -    | -    | -     | 0.22 | -    |
| 6-Hydroxynicotinic acid            | - | -    | 2.57 | -    | -    | 6.21  | 3.77 | -    |

Fold changes after Lecithin, EA, TPA, and water intake after 7 or 28 days. Values below 1 show a decrease in metabolites and more than 1 show an increase in metabolites. **SCFA:** short-chain fatty acid, change in all values are significant compare to day 0 (P<0.5).

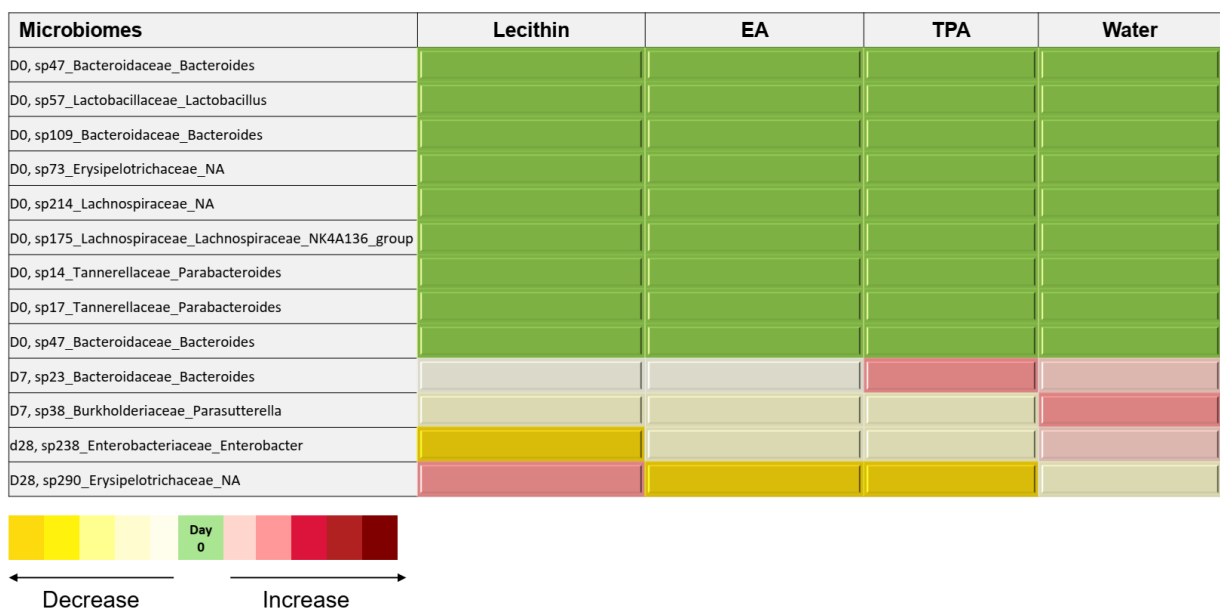

**Figure S1.** Change in microbiomes after 7 and 28 days, data from machine learning

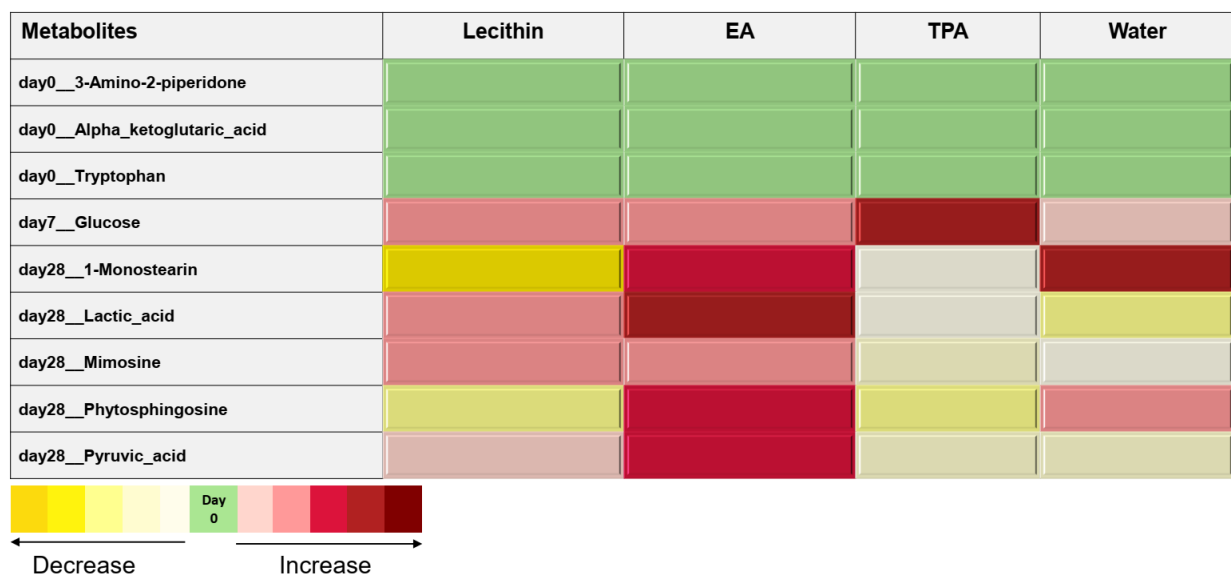

**Figure S2.** Change in metabolites after 7 and 28 days, data from machine learning

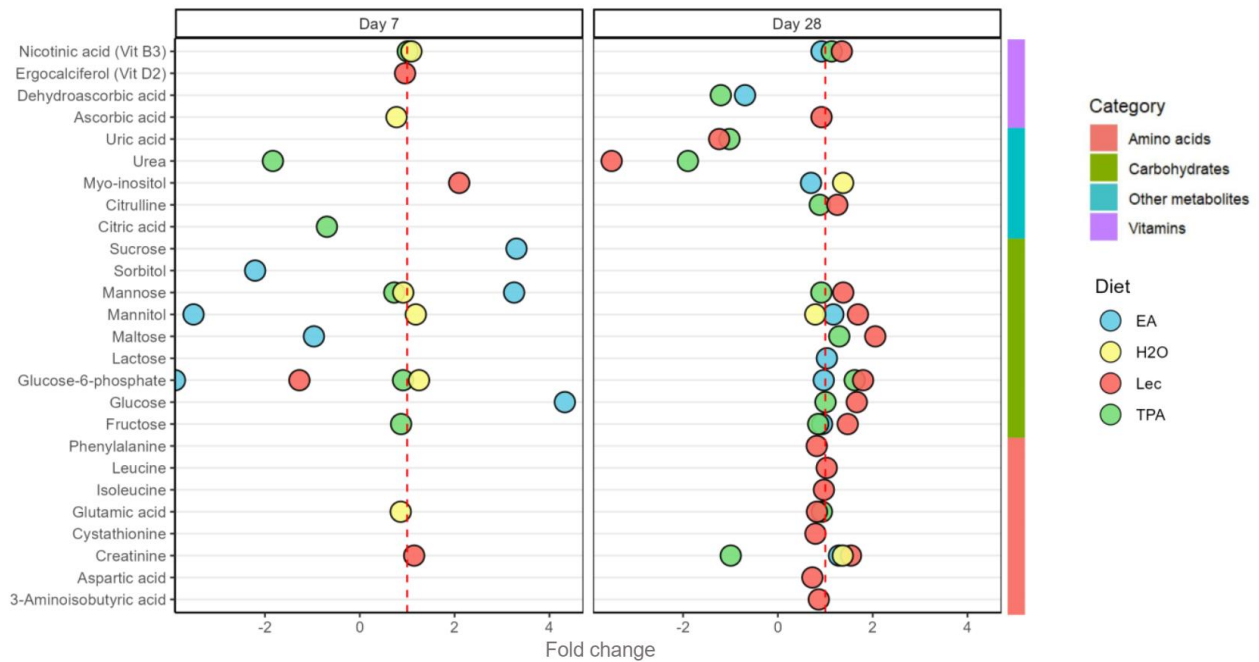

**Figure S3.** Fold changes Fold-change for quantitative (Q) metabolites after lecithin, EA, TPA, and water intake after 7 days and 28 days. Values below 1 show a decrease in metabolites and more than 1 show an increase in metabolites.

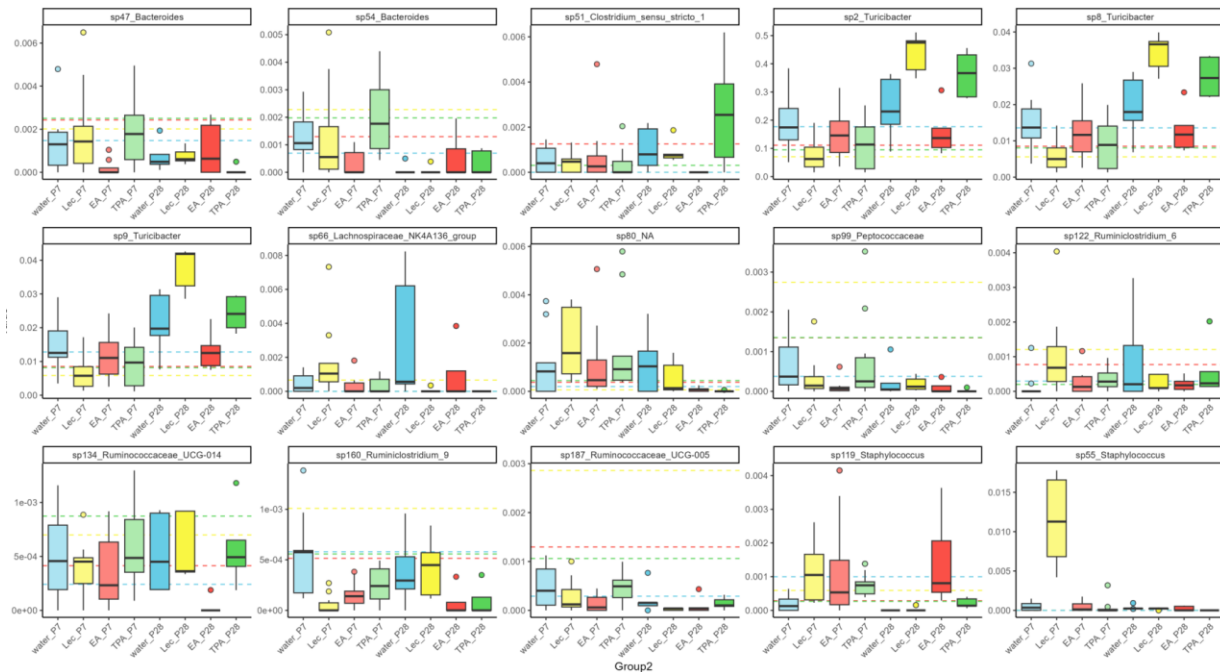

**Figure S4.** The abundance of all the (consensus) DA taxa across diet groups and timepoints.
